1     **miR-206 regulates the growth of the teleost tilapia (*Oreochromis niloticus*)**  
2                     **through the modulation of IGF-1 gene expression**

3  
4                     **Biao Yan, Chang-Dong Zhu, Jin-Tao Guo, Li-Hui Zhao, Jin-Liang Zhao**

5  
6                     Key laboratory of Freshwater Aquatic Genetic Resources, Shanghai Ocean University,  
7                     Ministry of Agriculture, Shanghai Ocean University, Shanghai 201306, China

8  
9  
10  
11  
12  
13  
14     **Correspondence to:** Jin-Liang Zhao

15     Shanghai Ocean University, Huchenghuan Road #999, 201306, Shanghai, China

16     Tel: 086- 21-66111430

17     Fax: 086-21-65988326

18     E-mail: jlzhao@shou.edu.cn

19

20

21

22

23

24 **Abstract**

25       MicroRNAs (miRNAs) are ~22 nt noncoding RNAs that play a crucial role in regulating  
26 muscle development. Our previous study shows that miR-206 is specifically expressed in tilapia  
27 skeletal muscle, and exhibits dynamic expression pattern at different developmental stages. Here,  
28 we reveal that miR-206 emerges as a crucial regulator of tilapia growth. miR-206 loss of  
29 function leads to the acceleration of tilapia growth. IGF-1 is identified as the target gene of  
30 miR-206. miR-206 directly changes IGF-1 expression by targeting its 3'-UTR, and inhibition of  
31 miR-206 substantially increases IGF-1 mRNA level *in vivo*. Thus, miR-206 would be developed  
32 as a molecular marker to assist fish breeding.

33

34 **Key words:** Nile tilapia, miR-206, growth performance, IGF-1

35

36

37

38

39

40

41

42

43

44

45

## 46 **Introduction**

47 Nile tilapia, *Oreochromis niloticus*, is one of the most commonly farmed species in  
48 freshwater aquaculture. It has become a major source of protein around the world because of its  
49 superior growth performance and its outstanding adaptability to a wide range of environment  
50 (Davis et al., 2010; Ponzoni et al., 2010). Thus, better understanding of the regulatory mechanism  
51 of tilapia growth will provide important information for both developmental biologists and fish  
52 breeding experts.

53 miRNAs are endogenous ~22 nucleotide noncoding RNAs, which act as post-transcriptional  
54 regulators in animals and plants (Winter et al., 2009). They result in mRNA cleavage or  
55 translational repression by forming imperfect base pairing with the 3'-UTR region of the target  
56 gene (Bartel, 2004; Winter et al., 2009). miRNAs have been implicated in regulating numerous  
57 physiological processes such as embryogenesis, organ development, cellular differentiation, and  
58 cellular apoptosis. miRNA deregulation can influence normal cell growth and development,  
59 resulting in numerous disorders (Fiore et al., 2008; Zhao and Srivastava, 2007). Furthermore,  
60 miRNAs are usually expressed in a tissue-specific manner (Kim et al., 2006; Makeyev and  
61 Maniatis, 2008; Sweetman et al., 2008). Our previous study has revealed that miR-206 is specially  
62 expressed in tilapia skeletal muscle, and its expression level is tightly associated with the  
63 developmental stage of tilapia (Yan et al., 2012a). Thus, we speculated that miR-206 may be  
64 involved in the regulation of growth in tilapia. However, the precise role of miR-206 in tilapia is  
65 still unclear.

66 Antagomirs are cholesterol-conjugated single-stranded RNA molecules, which are 21-23

67 nucleotides in length and complementary to the mature target miRNA (Krützfeldt et al., 2005).  
68 They are perfectly complementary to specific miRNA target with either mispairing at the cleavage  
69 site of Ago2 or some sort of base modification to inhibit Ago2 cleavage (Krützfeldt et al., 2005).  
70 Antagomirs can block endogenous miRNA expression in mouse, zebrafish, and cell lines (Ma et  
71 al., 2010; Morton et al., 2008; Selvamani et al., 2012). Here, we employed this method to inhibit  
72 endogenous miR-206 expression, and then examine the regulatory role of miR-206 in tilapia  
73 growth. We found that the administration of miR-206 antagomir results in a significant reduction  
74 in endogenous miR-206 expression, and a marked growth acceleration in tilapia through  
75 up-regulating IGF-1 expression.

## 76 **Materials and methods**

### 77 **Fish and growth experiment**

78 Nile tilapias were obtained from the fishery farm of Shanghai Ocean University. They were  
79 temporarily raised in a water circulation system in 100-liter tanks, and water temperature was kept  
80 at  $28 \pm 3^\circ\text{C}$  under a 12-h light/12-h dark photoperiod. Each fish was anesthetized in sodium  
81 bicarbonate-buffered MS-222 ( $200 \text{ mg L}^{-1}$ , Sigma, St. Louis, MO, USA) prior to collection of  
82 required tissue sample. The study was performed according to the Guide for the Care and Use of  
83 Laboratory Animals of China.

84 Tilapia weighing about 1 g was injected with miR-206 antagomir, mismatched antagomir, or  
85 left untreated, respectively. Thirty fish for each treatment were cultured in 50 L fiberglass tank,  
86 and four replicates were set for this experiment. During the growth experiment, fish were fed with  
87 commercial feed, floating pellets containing 30% protein. Daily water was changed about 20% of  
88 the total volume. Dissolved oxygen, pH, total ammonia and temperature were detected every day.

89 Water quality parameters were not analyzed in depth but tests were conducted to determine  
90 whether there were significant differences in the key parameters (pH, DO, total ammonia) among  
91 different treatments. At the termination of the experiment, all the fish in each treatment was  
92 weighed collectively, and the average final weight was recorded. The following indices were  
93 calculated to interpret growth performance (El-Sayed and Kawanna, 2008; Yan and Wang, 2010;  
94 Chen et al., 2011).

- 95 ● Initial weight (g) = wet weight of fish at the beginning of culture
- 96 ● Final weight (g) = wet weight of fish at the final of culture
- 97 ● Daily weight gain (DWG) = (final weight - initial weight) / culture days
- 98 ● Coefficient of variation final weight (CV) = mean standard deviation of the final  
99 weight/mean final weight
- 100 ● Feed conversion ratio (FCR) = feed consumption / weight gain
- 101 ● Feed intake (FI) =  $100 \times \text{feed consumption} / [\text{days} \times (\text{final weight} + \text{initial weight}) / 2]$

## 102 **Quantitative PCR**

103 Total RNAs were extracted using Trizol reagent (Invitrogen), and miRNAs were extracted  
104 using miRNeasy kit (Qiagen). Real-time PCR for IGF-1 was performed using SYBR Green PCR  
105 mixture (Takara) in MyiQ5 Real-time PCR Detection System (Bio-Rad). Gene expression was  
106 normalized relative to the housekeeping gene ( $\beta$ -actin). The primer sequences are as follows:  
107 IGF-1: 5'- GTCTGTGGAGAGCGAGGCTTT-3' (forward); 5'- CACGTGACCGCCTTGCA-3'  
108 (reverse);  $\beta$ -actin: 5'-GTCCCTGTACGCCTCTGGTCG-3' (forward); 5'-GCCGGACTCATCGTA  
109 CTCCTG -3' (reverse). The relative amount of miRNA was detected using stem-loop PCR, and  
110 U6 RNA was detected as the internal control. Relative gene or miRNA expression was determined

111 using the comparative Ct method, which is also referred to the 2<sup>-ΔΔCt</sup> method (Chen et al., 2005;  
112 Schmittgen and Livak, 2008).

### 113 **Silencing of miR-206 *in vivo* using antagomir method**

114 The antagomirs used in the study are single-stranded RNAs, which consist of a  
115 21-23-nucleotide length with modification as specified:

116 antagomir-133a: CsAsGCUGGUUGAAGGGGACCsA s As As-Chol-3’;

117 antagomir-206: CsCsACACACACUCCUUACAUs CsC sAs-Chol-3’;

118 mismatch antagomir: CsAsCGGUUCCAGGCACUGUsG sU s As -Chol-3’;

119 All nucleotides are 2’-OMe-modified; subscript ‘s’ represents a phosphorothioate linkage;  
120 ‘Chol’ represents cholesterol linked through a hydroxyprolinol linkage. They were deprotected,  
121 desalted and purified by high-performance liquid chromatography. Antagomir was dissolved in  
122 PBS buffer before injection. Tilapia weighing about 1 g received tail-vein injection of saline or  
123 antagomir at a dose of 60 mg/kg body weight in 0.02 ml/injection twice a week. Tissues were  
124 harvested, snap-frozen and stored at -80°C.

### 125 **Cell culture and 3’- UTR luciferase reporter assay**

126 HEK 293T cells were obtained from American Type Culture Collection (ATCC; Rockville,  
127 MD). They were maintained in Dulbecco's modified Eagle's medium (DMEM) with 10% FBS,  
128 100 U/mL penicillin, 100 µg/mL streptomycin, and 250 ng/mL amphotericin B, and maintained at  
129 37°C in a humidified 5% CO<sub>2</sub> incubator.

130 To generate the 3’-UTR luciferase reporter construct, the full length of the 3’-UTR from  
131 IGF-1 was cloned into the downstream of the firefly luciferase gene in pGL3-control vector  
132 (Promega). The QuikChange site-directed mutagenesis kit (Stratagene) was used to introduce one

133 or two point mutations into the seed region of pGL3-IGF-1, giving pGL3-IGF-1 m1 and pGL3-  
134 IGF-1 m2, respectively. For luciferase reporter assays, HEK 293T cells were plated at  $2 \times 10^5$  cells  
135 per well in 12-well dishes. Cells were transfected with either wild-type or mutant IGF-1-3'-UTR  
136 constructs, with and without miR-206 mimic or negative control mimic using lipofectamine 2000  
137 (Invitrogen). Luciferase activity was measured on a scintillation counter using a dual luciferase  
138 reporter system.

### 139 **Statistical analysis**

140 Values were expressed as mean  $\pm$  S.E.M. unless otherwise indicated. Significant differences  
141 across treatments were evaluated by using one-way analysis of variance (ANOVA) with the  
142 Bonferroni post hoc test. The significance level was chosen at  $P < 0.05$ .

### 143 **Results**

#### 144 **Antagomir treatment represses endogenous miR-206 expression in tilapia**

145 In our previous study, we have successfully used antagomir method to suppress endogenous  
146 miR-30c expression in tilapia (Yan et al., 2012b). Here, we determined whether antagomir method  
147 is able to efficiently repress miR-206 expression *in vivo*. As shown in figure 1, miR-206  
148 expression could be efficiently blocked by its corresponding antagomir (miR-206 antagomir) but  
149 not the mismatch miRNA (miR-133 antagomir). Furthermore, the silencing effect of antagomir  
150 could be detected at different time points (Fig. 1A and B). Thus, antagomir method is suitable for  
151 miRNA loss-of-function experiment in tilapia.

#### 152 **Effect of miR-206 silencing on the growth performance of tilapia**

153 To determine the role of miR-206 in regulating tilapia growth, we employed antagomir  
154 technique to achieve efficient miR-206 loss-of-function *in vivo*, and then compared the growth

155 performance between different treatments. During the 45-day culture period, water temperature  
156 ranged from 22°C to 28°C. Aeration was provided continuously, and DO was maintained greater  
157 than 5 mg L<sup>-1</sup>. pH was maintained between 7.4 and 8.4. Total ammonia (NH<sub>3</sub> /NH<sub>4</sub>) ranged from  
158 1.2 to 2.5 mg L<sup>-1</sup>. The survival rate of all fish was above 95%.

159 As shown in table 1, no significant difference was observed for the initial weight and feed  
160 intake value across different groups. The growth rate (DWG) and feed conversion ratio (FCR)  
161 were significantly affected by miR-206 intervention ( $P<0.05$ ). The growth rate of miR-206  
162 antagomir injection group was about 30% greater than that in the group injected with mismatch  
163 antagomir or the untreated group. Moreover, better FCR was observed in miR-206 antagomir  
164 injection group than in the other two groups. These results suggest that miR-206 silencing results  
165 in the growth acceleration in tilapia.

#### 166 **Identification of the target gene of miR-206 in tilapia**

167 To understand the mechanism of miR-206 regulation of tilapia growth, we sought to identify  
168 miR-206 target genes that are responsible for regulating tilapia growth. In generally, miRNA  
169 function involves uninterrupted base-pairing between nucleotides 2-7 of the miRNA and a  
170 complementary sequence in the 3' UTR of the target mRNA (Ulitsky et al., 2010). Based on this  
171 evidence, IGF-1 was predicted as a potential target gene of miR-206. We first evaluated the  
172 expression correlation between miR-206 and IGF-1 in HEK 293T cells. Compared with the  
173 control group, transfection with miR-206 inhibitor but not the negative control miRNA inhibitor  
174 caused a significant decrease in miR-206 expression. Meanwhile, IGF-1 expression was markedly  
175 up-regulated upon miR-206 inhibition (Fig. 2 A and B). Moreover, we found that miR-206  
176 inhibition by antagomir treatment resulted in a significant reduction in miR-206 expression, but a



177 significant increase in IGF-1 expression in tilapia (Fig. 2 C and D).

178 Next, we tested whether IGF-1 expression is post-transcriptionally regulated by miR-206.  
179 The 3'-UTR of IGF-1 was cloned into the downstream of luciferase gene, and luciferase reporter  
180 assay was conducted in HEK 293T cells. Cotransfection of miR-206 mimic with the luciferase  
181 reporter gene linked to the wild-type 3'-UTR of IGF-1 resulted in a significant decrease in  
182 luciferase activity. In contrast, cotransfection of a control miRNA mimic (not complementary to  
183 the 3'-UTRs of IGF-1) with the wild-type 3'-UTR constructs did not result in a decrease in  
184 luciferase activity. Furthermore, cotransfection of miR-206 mimic with the constructs containing  
185 mutated IGF-1 3'-UTR sequences did not result in a marked decrease in luciferase activity (Fig.  
186 2E). Taken together, these results suggest that IGF-1 is a target gene of miR-206.

## 187 **Discussion**

188 Growth in fish involves the recruitment and hypertrophy of muscle fibres. Fish muscle growth  
189 is not linear and occurs through a combination of hyperplasia and hypertrophy in post-juvenile  
190 stages. miRNAs are a class of non-coding RNAs that have emerged as critical regulators in the  
191 expression and function of eukaryotic genomes. They can regulate skeletal muscle development  
192 through targeting of the crucial genes controlling myogenesis (Eisenberg et al., 2009; Williams et  
193 al., 2009). Given fish growth is tightly associated with skeletal muscle development, the  
194 expression of muscle specific-miRNAs may be involved in regulating fish growth (Johnston et al.,  
195 2011; Rescan, 2008). Thus, the elucidation of miRNA function in muscle development will  
196 enhance our understanding of skeletal muscle biology and may give some hints for  
197 marker-assisted fish breeding. Previous studies reveal that cardiac and/or skeletal muscle are  
198 highly enriched in many miRNAs, including miR-1, miR-133, miR-206, miR-208, miR-486 and

199 miR-499 (Güller and Russell, 2010; Ge and Chen, 2011). Here, we show that miR-206 participates  
200 in a regulatory circuit that allows rapid gene program transition during the regulation of tilapia  
201 growth.

202 miR-206 is a muscle-specific miRNA, and its role in muscle development has been verified  
203 in some animal models, including mouse, rat and zebrafish (Anderson et al., 2006; Kim et al.,  
204 2006; Mishima et al., 2009; Shan et al., 2009). Our previous study reveals that miR-206 is  
205 specifically expressed in tilapia skeletal muscle, and shows dynamic expression pattern among  
206 different developmental stages (Yan et al., 2012a). These evidences promote us to consider  
207 whether its expression level can affect the growth performance of tilapia. As expected, miR-206  
208 loss of function *in vivo* significantly improves tilapia growth performance. It is well known that  
209 miRNA-guided regulatory network induces mRNA cleavage or translational repression by  
210 forming imperfect base pairing with the 3'-UTR region of the target gene. We further reveal that  
211 IGF-1 is direct target gene of miR-206.

212 IGF-1 is one of the important members in IGF signaling, and involved in the regulation of  
213 growth and development of skeletal muscle in many vertebrates (Duan et al., 2010). For example,  
214 the birth weight of IGF-1 or IGF-2 knockout mice is about 60% of their wild type littermates (Liu  
215 et al., 1993). Over-expression of IGF-1 in mice increases the body weight by 30% (Mathews et al.,  
216 1988). In many fish species, IGF-1 blood level or tissue IGF-1 mRNA level positively correlate  
217 with dietary ration, dietary protein content, and body growth rate (Carnevali et al., 2006; Beckman  
218 et al., 2004). Treatment of fish with IGF-1 implants contributes to accelerating growth  
219 (McCormick et al., 1992). In this study, miR-206 inhibition results in a significant increase in  
220 IGF-1 expression. Thus, we speculate that miR-206 regulation of tilapia growth is mainly

221 mediated by the up-regulation of IGF-1 expression. IGF-1 mRNA is detected in all life stages of  
222 fish ranging from the unfertilized egg to the adult. The temporal and spatial expression patterns of  
223 fish IGF-1 seem to be similar to those in mammals. In addition, nutrition condition or hormone  
224 treatment changes IGF-1 level in fish as they do in mammals. These features suggest that the IGF  
225 system is highly conserved between teleost fish and mammals (Duan, 1998; Bower et al., 2008;  
226 Johnston et al., 2011). Thus, understanding of tilapia IGF-1 action would contribute to the basic  
227 growth physiology of vertebrates and provide important implication in muscle hypertrophy,  
228 muscle atrophy, and muscle regeneration of other vertebrates.

229 In summary, we found that miRNA antagomir is able to repress endogenous miRNA  
230 expression in tilapia. miR-206 antagomir results in a significant reduction in endogenous miR-206  
231 level, and an obvious acceleration of tilapia growth through targeting IGF-1 expression. Given the  
232 role of miR-206 in tilapia growth, it would be developed as a promising molecular marker to assist  
233 the selection of faster-growing fish strains.

234

### 235 **Acknowledgements**

236 This work was supported by China Agriculture Research System (CARS-49-04B to J.-L.Z.)  
237 and Shanghai Educational Development Foundation (12CG56 to B.Y.).

238

239

240

241

242

243

244 **References**

245 **Anderson, C., Catoe, H. and Werner, R.** (2006). miR-206 regulates connexin43 expression  
246 during skeletal muscle development. *Nucleic. Acids. Res.* **34**, 5863-5871.

247 **Beckman, B. R., Shimizu, M., Gadberry, B. A. and Cooper, K. A.** (2004). Response of the  
248 somatotropic axis of juvenile coho salmon to alterations in plane of nutrition with an analysis of  
249 the relationships among growth rate and circulating IGF-I and 41kDa IGFBP. *Gen. Comp. Endocr.*  
250 **135**, 334-344.

251 **Bartel, D. P.** (2004). MicroRNAs: genomics, biogenesis, mechanism, and function. *Cell* **116**,  
252 281-297.

253 **Bower, N. I., Li, X., Taylor, R. and Johnston, I. A.** (2008). Switching to fast growth: the  
254 insulin-like growth factor (IGF) system in skeletal muscle of Atlantic salmon. *J. Exp. Biol.* **211**,  
255 3859-3570.

256 **Carnevali, O., de Vivo, L., Sulpizio, R., Gioacchini, G., Olivotto, I., Silvi, S. and Cresci, A.**  
257 (2006). Growth improvement by probiotic in European sea bass juveniles (*Dicentrarchus labrax*,  
258 *L.*), with particular attention to IGF-1, myostatin and cortisol gene expression. *Aquaculture* **258**,  
259 430-438.

260 **Chen, W., Ai, Q., Mai, K., Xu, W., Liufu, Z., Zhang, W. and Cai, Y.** (2011) Effects of dietary  
261 soybean saponins on feed intake, growth performance, digestibility and intestinal structure in  
262 juvenile Japanese flounder (*Paralichthys olivaceus*). *Aquaculture* **318**, 95-100.

263 **Chen, C., Ridzon, D. A., Broomer, A. J., Zhou, Z., Lee, D. H., Nguyen, J. T., Barbisin, M., Xu,**  
264 **N. L., Mahuvakar, V. R. and Andersen, M. R.** (2005). Real-time quantification of microRNAs

265 by stem-loop RT-PCR. *Nucleic Acids Res.* **33**, e179-e179.

266 **Davis, L. K., Fox, B. K., Lim, C., Lerner, D. T., Hirano, T. and Grau, E. G.** (2010). Effects of  
267 11-ketotestosterone and fishmeal in the feed on growth of juvenile tilapia (*Oreochromis*  
268 *mossambicus*). *Aquaculture* **305**, 143-149.

269 **Duan, C.** (1998). Nutritional and developmental regulation of insulin-like growth factors in fish. *J.*  
270 *Nutr.* **128**, 306S-314S.

271 **Duan, C., Ren, H. and Gao, S.** (2010). Insulin-like growth factors (IGFs), IGF receptors, and  
272 IGF-binding proteins: roles in skeletal muscle growth and differentiation. *Gen. Comp. Endocr.* **167**,  
273 344-351.

274 **Eisenberg, I., Alexander, M. S. and Kunkel, L. M.** (2009). miRNAs in normal and diseased  
275 skeletal muscle. *J. Cell. Mol. Med.* **13**, 2-11.

276 **El-Sayed, A. F. M. and Kawanna, M.** (2008). Optimum water temperature boosts the growth  
277 performance of Nile tilapia (*Oreochromis niloticus*) fry reared in a recycling system. *Aquac. Res.*  
278 **39**, 670-672.

279 **Fiore, R., Siegel, G. and Schratt, G.** (2008). MicroRNA function in neuronal development,  
280 plasticity and disease. *BBA-Gene Regul. Mech.* **1779**, 471-478.

281 **Güller, I. and Russell, A. P.** (2010). MicroRNAs in skeletal muscle: their role and regulation in  
282 development, disease and function. *J. Physiol.* **588**, 4075-4087.

283 **Ge, Y. and Chen, J.** (2011). MicroRNAs in skeletal myogenesis. *Cell Cycle* **10**, 441-448.

284 **Johnston, I. A., Bower, N. I. and Macqueen, D. J.** (2011). Growth and the regulation of  
285 myotomal muscle mass in teleost fish. *J. Exp. Biol.* **214**, 1617-1628.

286 **Kim, H. K., Lee, Y. S., Sivaprasad, U., Malhotra, A. and Dutta, A.** (2006). Muscle-specific

287 microRNA miR-206 promotes muscle differentiation. *J. Cell Biol.* **174**, 677-687.

288 **Krützfeldt, J., Rajewsky, N., Braich, R., Rajeev, K. G., Tuschl, T., Manoharan, M. and Stoffel,**  
289 **M.** (2005). Silencing of microRNAs in vivo with 'antagomirs'. *Nature* **438**, 685-689.

290 **Liu, J. P., Baker, J., Perkins, A. S., Robertson, E. J. and Efstratiadis, A.** (1993). Mice carrying  
291 null mutations of the genes encoding insulin-like growth factor I (Igf-1) and type 1 IGF receptor  
292 (Igf1r). *Cell* **75**, 59-72.

293 **Ma, L., Reinhardt, F., Pan, E., Soutschek, J., Bhat, B., Marcusson, E. G., Teruya-Feldstein, J.,**  
294 **Bell, G. W. and Weinberg, R. A.** (2010). Therapeutic silencing of miR-10b inhibits metastasis in  
295 a mouse mammary tumor model. *Nat. Biotechnol.* **28**, 341-347.

296 **Makeyev, E. V. and Maniatis, T.** (2008). Multilevel regulation of gene expression by microRNAs.  
297 *Science's STKE* **319**, 1789-1790.

298 **Mathews, L. S., Hammer, R. E., Behringer, R. R., D'ercole, A. J., Bell, G. I., Binster, R. L.**  
299 **and Palmiter, R. D.** (1988). Growth enhancement of transgenic mice expressing human  
300 insulin-like growth factor I. *Endocrinology* **123**, 2827-2833.

301 **McCormick, S. D., Kelley, K. M., Young, G., Nishioka, R. S. and Bern, H. A.** (1992).  
302 Stimulation of coho salmon growth by insulin-like growth factor I. *Gen. Comp. Endocr.* **86**,  
303 398-406.

304 **Mishima, Y., Abreu-Goodger, C., Staton, A. A., Stahlhut, C., Shou, C., Cheng, C., Gerstein,**  
305 **M., Enright, A. J. and Giraldez, A. J.** (2009). Zebrafish miR-1 and miR-133 shape muscle gene  
306 expression and regulate sarcomeric actin organization. *Gene. Dev.* **23**, 619-632.

307 **Morton, S. U., Scherz, P. J., Cordes, K. R., Ivey, K. N., Stainier, D. Y. R. and Srivastava, D.**  
308 (2008). microRNA-138 modulates cardiac patterning during embryonic development. *P. Natl.*

309 *Acad. Sci.USA* **105**, 17830-17835.

310 **Ponzoni, R. W., Khaw, H. L., Nguyen, N. H. and Hamzah, A.** (2010). Inbreeding and effective  
311 population size in the Malaysian nucleus of the GIFT strain of Nile tilapia (*Oreochromis niloticus*).  
312 *Aquaculture* **302**, 42-48.

313 **Reinecke, M., Björnsson, B. T., Dickhoff, W. W., McCormick, S. D., Navarro, I., Power, D. M.**  
314 **and Gutiérrez, J.** (2005). Growth hormone and insulin-like growth factors in fish: where we are  
315 and where to go. *Gen. Comp. Endocr.* **142**, 20-24.

316 **Rescan, P. Y.** (2008). New insights into skeletal muscle development and growth in teleost fishes.  
317 *J. Exp. Zool.* **310**, 541-548.

318 **Schmittgen, T. D. and Livak, K. J.** (2008). Analyzing real-time PCR data by the comparative CT  
319 method. *Nat.Protoc.* **3**, 1101-1108.

320 **Selvamani, A., Sathyan, P., Miranda, R. C. and Sohrabji, F.** (2012). An antagomir to  
321 microRNA let7f promotes neuroprotection in an ischemic stroke model. *PLoS ONE* **7**, e32662.

322 **Shan, Z. X., Lin, Q. X., Fu, Y. H., Deng, C. Y., Zhou, Z. L., Zhu, J. N., Liu, X. Y., Zhang, Y. Y.,**  
323 **Li, Y. and Lin, S. G.** (2009). Upregulated expression of miR-1/miR-206 in a rat model of  
324 myocardial infarction. *Biochem. Bioph. Res. Co.* **381**, 597-601.

325 **Sweetman, D., Goljanek, K., Rathjen, T., Oustanina, S., Braun, T., Dalmay, T. and**  
326 **Münsterberg, A.** (2008). Specific requirements of MRFs for the expression of muscle specific  
327 microRNAs, miR-1, miR-206 and miR-133. *Dev. Biol.* **321**, 491-499.

328 **Ulitsky, I., Laurent, L. C. and Shamir, R.** (2010). Towards computational prediction of  
329 microRNA function and activity. *Nucleic. Acids. Res.* **38**, e160-e160.

330 **Williams, A. H., Liu, N., van Rooij, E. and Olson, E. N.** (2009). MicroRNA control of muscle

331 development and disease. *Curr. Opin. Cell. Biol.* **21**, 461-469.

332 **Winter, J., Jung, S., Keller, S., Gregory, R. I. and Diederichs, S.** (2009). Many roads to  
333 maturity: microRNA biogenesis pathways and their regulation. *Nat. Cell Biol.* **11**, 228-234.

334 **Yan, B., Guo, J.T., Zhao, L.H., Zhao, J.L. (2012a)** microRNA expression signature in skeletal  
335 muscle of Nile tilapia. *Aquaculture* doi: 10.1016/j.aquaculture.2012.08.018.

336 **Yan, B., Guo, J.T., Zhao, L.H., Zhao, J.L. (2012b)** miR-30c: A novel regulator of salt tolerance  
337 in tilapia. *Biochem. Biophys. Res. Commun.* **425**,315-320.

338 **Yan, B. and Wang, Z.** (2010). Growth, salinity tolerance and microsatellite analysis of the F<sub>2</sub>  
339 reciprocal hybrids of *Oreochromis niloticus*× *Sarotherodon galilaeus* at different salinities. *Aquac.*  
340 *Res.* **41**, e336-e344.

341 **Zhao, Y. and Srivastava, D.** (2007). A developmental view of microRNA function. *Trends*  
342 *Biochem. Sci.* **32**, 189-197.

343

344

345

346

347

348

349

350

351

352



353

354 **Figure legend**

355 **Fig.1 Effect of antagomir treatment on endogenous miRNA expression**

356 (A and B) Tilapia was injected with miR-133 antagomir or miR-206 antagomir, respectively. The  
357 expression of miR-133 or miR-206 level was detected using stem-loop PCR. The relative amount  
358 of miR-133 or miR-206 was normalized to the endogenous control, U6 snRNA expression. Results  
359 are expressed as means  $\pm$  S.E.M. of three independent experiments. Asterisk indicates significant  
360 difference compared with the control group. Each sample was analyzed in triplicate. The results  
361 were expressed as the change in treated groups relative to the untreated group.

362 **Fig.2 Identification of IGF-1 as the target gene of miR-206 in tilapia**

363 (A) HEK 293T cells were transfected with negative control miRNA inhibitor, miR-206 inhibitor or  
364 left untreated for 48 h. The level of miR-206 expression was determined using stem-loop PCR.  
365 miR-206 relative amount was normalized to endogenous control U6 snRNA expression. (B) HEK  
366 293T cells were treated as Fig. 2A. The level of IGF-1 expression was detected using real-time  
367 PCR. IGF-1 relative amount was normalized to  $\beta$ -actin expression. (C and D) Tilapia was injected  
368 with miR-206 antagomir, mismatched antagomir or left untreated, respectively. The expression of  
369 miR-206 or IGF-1 was detected as described in "Material and Method" Section. Results were  
370 expressed as means  $\pm$  S.E.M. of three independent experiments. Asterisk indicated significant  
371 difference compared with the control group. (E) Luciferase assays were carried out to address  
372 whether IGF-1 was directly targeted by miR-206. Luciferase activities were normalized to the  
373 group transfected with PGL3. HEK 293T cells were transfected as shown, and luciferase activity  
374 was determined 48 h after transfection. The cells transfected with PGL3 plus miR-206 were used as

375 the control group. Data represent the mean  $\pm$  S.E.M. from three independent experiments. \*,  $P <$

376 0.05. wt: PGL3-IGF-3'-UTR; m1: PGL3-IGF-3'-UTR mutant 1; m2: PGL3-IGF-3'-UTR mutant 2;

377 miR-NG: miRNA which is not complementary to the 3'-UTRs of IGF-1.

378 **Table 1: Effects of miR-206 intervention on the growth performance of tilapia**

**A**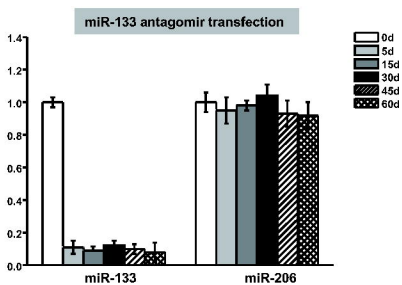**B**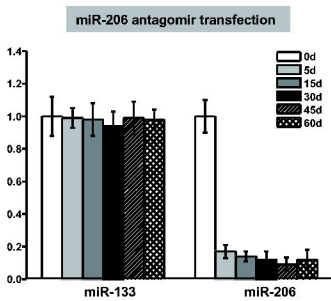

**A**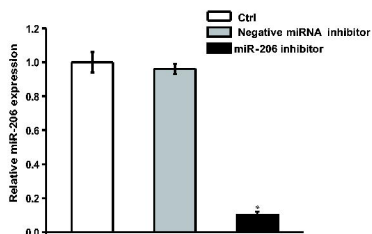**B**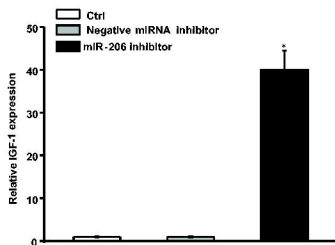**C**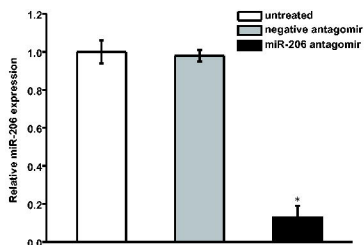**D**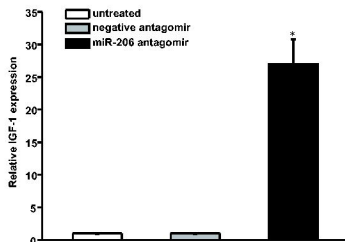**E**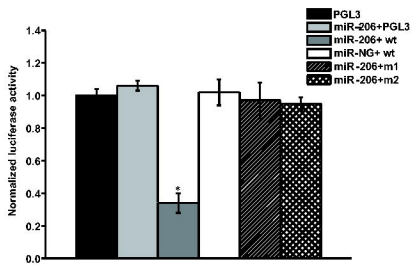

**Table 1: Effects of miR-206 intervention on the growth performance of tilapia**

|                    | untreated    | mismatched antagomir | miR-206 antagomir |
|--------------------|--------------|----------------------|-------------------|
| Initial weight (g) | 1.0 ± 0.09 a | 0.95 ± 0.04 a        | 0.98 ± 0.11 a     |
| Final weight (g)   | 25 ± 2.4 a   | 23 ± 4.0 a           | 36 ± 5.2 b        |
| Survival rate (%)  | 98 a         | 96 a                 | 95 a              |
| CV                 | 0.10 a       | 0.17 a               | 0.14 a            |
| DWG                | 0.53 a       | 0.49 a               | 0.78 b            |
| FCR                | 3.3±0.26 a   | 3.6±0.75 a           | 2.4±0.39 b        |
| Feed intake (%)    | 3.2 ± 0.23 a | 3.0 ± 0.49 a         | 2.94 ± 0.31 a     |

Values are expressed as means ± SEM of four replicates. Means in the same row with different superscripts are significantly different from each other determined by using one-way analysis of variance (ANOVA) with the Bonferroni post hoc test (  $P < 0.05$  ).
